# Supplementary material
Source: Springer Nature journal article supplement (https://www.springermedizin.de/resource/supplementary/13550_2012_114_MOESM1_ESM.pdf/9687616)

A

Control

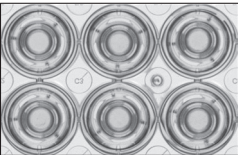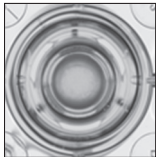

Cystic Fibrosis

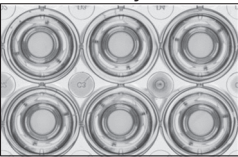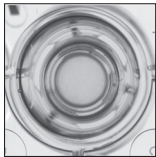

B

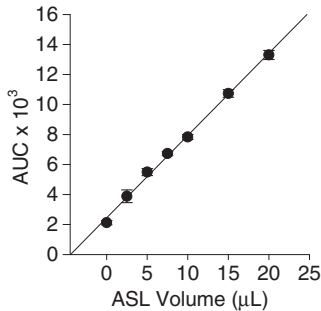

Supplement: MOESM1 [file 9687616]
